# Supplementary material
Source: ML conference proceedings conference paper supplement (https://openreview.net/forum?id=XsWGVbPfB4Z)
Supplement: supplementary_material [file attachment]

# Supplementary Material

## 4D-Former: Multimodal 4D Panoptic Segmentation

Anonymous Author(s)

Affiliation

Address

email

1 In this supplementary material, we first provide an illustration of the proposed Tracklet Association  
2 tion Module (in Sec. 1) and then present detailed class-wise results on the benchmarks (in Sec. 2).  
3 Finally, we show additional qualitative results (in Sec. 3).

### 4 1 Tracklet Association Module

5 We provide an illustration of the proposed Tracklet Association Module (TAM) in Fig.1. The input  
6 to our TAM is constructed by concatenating the following attributes of the input tracklet pair along  
7 the feature dimension: (1) their  $(x, y, z)$  mask centroid coordinates, (2) their respective tracklet  
8 queries, (3) the frame gap between them, and (4) their mask IoU. The frame gap and mask centroid  
9 coordinates are expanded to 64-D each by applying sine/cosine activations with various frequencies.  
10 The concatenated set of features is input to a 4-layer MLP which produces a scalar association score  
11 for the input tracklet pair.

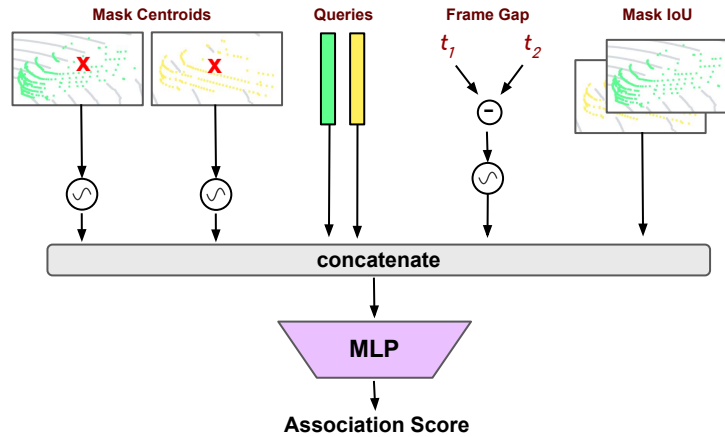

Figure 1: Illustration of the Tracklet Association Module (TAM).

### 12 2 Detailed Quantitative Results

13 We present the detailed per-class results for: nuScenes val set (Tab. 1), nuScenes test set (Tab. 2),  
14 and SemanticKITTI val set (Tab.3).

| Metric | mean  | Barrier | Bicycle | Bus   | Car   | Construction | Motorcycle | Pedestrian | Traffic Cone | Trailer | Truck | Drivable | Other Flat | Sidewalk | Terrain | Manmade | Vegetation |
|--------|-------|---------|---------|-------|-------|--------------|------------|------------|--------------|---------|-------|----------|------------|----------|---------|---------|------------|
| PTQ    | 75.17 | 64.11   | 74.33   | 79.05 | 90.89 | 64.64        | 81.87      | 88.03      | 83.04        | 58.67   | 76.92 | 95.61    | 51.92      | 68.92    | 54.61   | 82.46   | 87.59      |
| sPTQ   | 75.50 | 65.25   | 75.33   | 79.39 | 91.16 | 64.94        | 82.43      | 88.47      | 83.65        | 59.14   | 77.26 | 95.61    | 51.92      | 68.92    | 54.61   | 82.46   | 87.59      |
| IoU    | 78.86 | 82.74   | 52.69   | 90.41 | 94.31 | 54.95        | 88.96      | 82.66      | 68.98        | 65.41   | 82.57 | 96.32    | 71.33      | 73.36    | 75.54   | 91.80   | 89.75      |
| PQ     | 77.34 | 68.59   | 79.51   | 80.98 | 93.51 | 67.63        | 86.77      | 91.71      | 87.74        | 61.00   | 78.91 | 95.61    | 51.92      | 68.92    | 54.61   | 82.46   | 87.59      |
| SQ     | 89.02 | 82.53   | 87.83   | 93.95 | 95.73 | 88.56        | 91.36      | 93.59      | 90.53        | 86.60   | 93.66 | 96.13    | 84.50      | 79.75    | 78.79   | 91.11   | 89.64      |
| RQ     | 86.46 | 83.11   | 90.52   | 86.19 | 97.68 | 76.37        | 94.98      | 98.00      | 96.92        | 70.44   | 84.26 | 99.45    | 61.45      | 86.42    | 69.30   | 90.51   | 97.72      |

Table 1: Class-wise results on nuScenes val set. Metrics are provided in [%]

| Metric | mean  | Barrier | Bicycle | Bus   | Car   | Construction | Motorcycle | Pedestrian | Traffic Cone | Trailer | Truck | Drivable | Other Flat | Sidewalk | Terrain | Manmade | Vegetation |
|--------|-------|---------|---------|-------|-------|--------------|------------|------------|--------------|---------|-------|----------|------------|----------|---------|---------|------------|
| PTQ    | 75.47 | 63.20   | 73.20   | 75.21 | 90.14 | 62.44        | 81.01      | 89.11      | 84.95        | 65.46   | 75.13 | 97.10    | 46.13      | 71.44    | 58.00   | 85.16   | 89.85      |
| sPTQ   | 75.90 | 64.63   | 73.98   | 75.42 | 90.45 | 63.73        | 81.92      | 89.57      | 85.48        | 66.14   | 75.43 | 97.10    | 46.13      | 71.44    | 58.00   | 85.16   | 89.85      |
| IoU    | 80.42 | 86.66   | 48.99   | 92.24 | 91.72 | 68.22        | 79.79      | 79.84      | 77.24        | 85.54   | 73.81 | 97.41    | 66.51      | 78.50    | 76.62   | 93.04   | 90.62      |
| PQ     | 77.99 | 68.63   | 78.30   | 77.48 | 93.01 | 69.07        | 86.69      | 92.64      | 89.13        | 68.17   | 77.05 | 97.10    | 46.13      | 71.44    | 58.00   | 85.16   | 89.85      |
| SQ     | 89.66 | 81.69   | 89.13   | 94.74 | 95.80 | 87.12        | 92.62      | 93.94      | 91.63        | 88.30   | 94.29 | 97.36    | 85.46      | 81.85    | 78.04   | 91.08   | 91.51      |
| RQ     | 86.59 | 84.01   | 87.85   | 81.78 | 97.09 | 79.28        | 93.60      | 98.62      | 97.28        | 77.19   | 81.71 | 99.73    | 53.98      | 87.28    | 74.31   | 93.50   | 98.19      |

Table 2: Class-wise results on nuScenes test set. Metrics are provided in [%]

| Metric | mean | Car  | Bicycle | Motorcycle | Truck | Other Vehicle | Person | Bicyclist | Motorcyclist | Road | Parking | Sidewalk | Other Ground | Building | Fence | Vegetation | Trunk | Terrain | Pole | Traffic Sign |
|--------|------|------|---------|------------|-------|---------------|--------|-----------|--------------|------|---------|----------|--------------|----------|-------|------------|-------|---------|------|--------------|
| Assoc  | 80.9 | 89.0 | 32.0    | 63.0       | 88.0  | 56.0          | 49.0   | 82.0      | 31.0         | -    | -       | -        | -            | -        | -     | -          | -     | -       | -    | -            |
| IoU    | 67.6 | 97.0 | 61.0    | 78.0       | 84.0  | 73.0          | 83.0   | 95.0      | 0.0          | 96.0 | 44.0    | 80.0     | 4.0          | 88.0     | 56.0  | 89.0       | 71.0  | 76.0    | 66.0 | 45.0         |

Table 3: Class-wise results on SemanticKITTI val set. Metrics are provided in [%]. Note that association metrics are not available for ‘stuff’ classes.

### 3 Qualitative Comparison (LiDAR-only vs. Fusion)

Figures 2 and 3 provide a qualitative comparison of our proposed method with the LiDAR-only baseline (Tab. 4, row 1 in the main text). We provide the segmentation results in the LiDAR domain for both LiDAR-only and fusion models in the first two columns, respectively, and the corresponding camera view in the third column. The region of interest in each case is highlighted in red.

In the first example (Fig. 2), the baseline wrongly segments the building at range as vegetation due to the limited information obtained from the LiDAR input. By contrast, the final model with fusion effectively leverages the rich contextual information from the camera (highlighted by the red box) and segments the correct class.

In the second example (Fig. 3), the baseline fails to track pedestrians when they are close to each other (the two pedestrians on the left are merged together as a single instance). By contrast, the camera view provides distinct appearance cues for each pedestrian, enabling our model to accurately segment and track them.

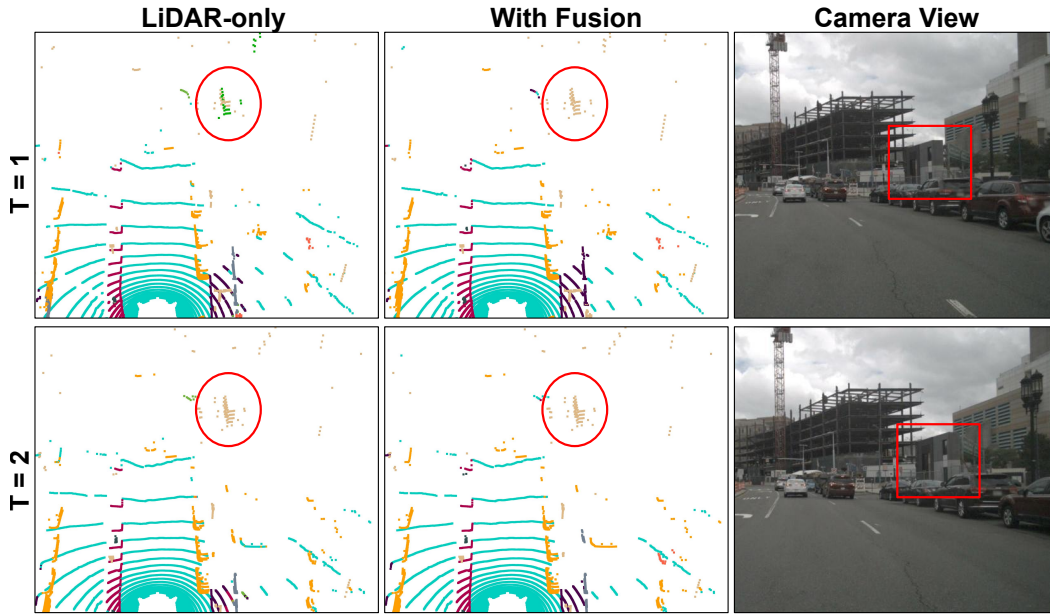

Figure 2: Qualitative comparison of semantic segmentation for LiDAR-only vs. fusion model on sequence 0105 from nuScenes.

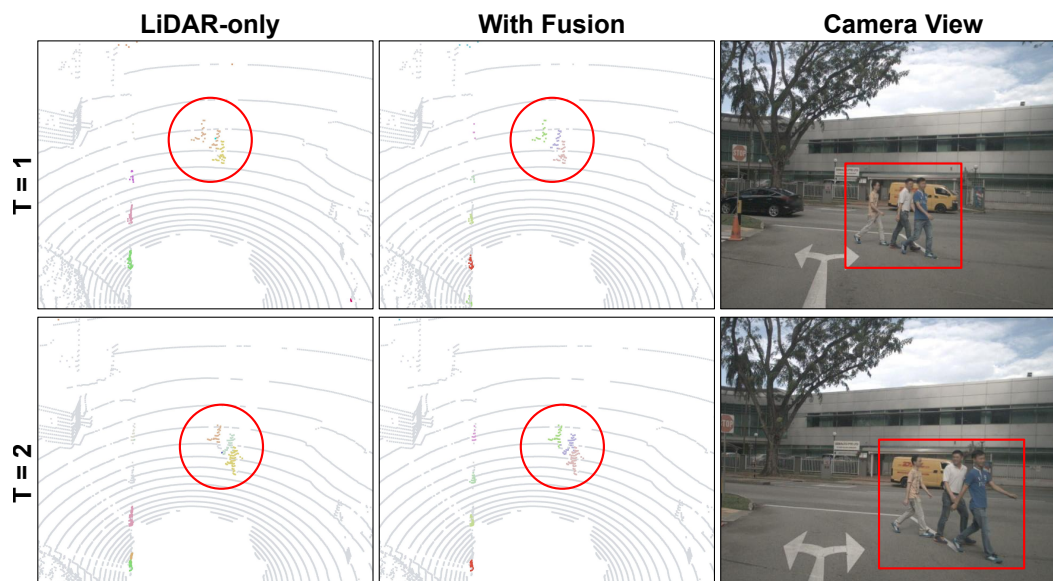

Figure 3: Qualitative comparison of instance segmentation and tracking for LiDAR-only vs. fusion model on sequence 0003 from nuScenes.
